# Supplementary material for: Prescription medications for sleep disturbances among midlife women during 2 years of follow-up: a SWAN retrospective cohort study
Source: PubMed Central journal article supplement — BMJ Open. 2021 May 11;11(5):e045074. doi: 10.1136/bmjopen-2020-045074 (PMC8127972; doi:10.1136/bmjopen-2020-045074), 2021-05-11
Supplement: bmjopen-2020-045074supp001.pdf [file bmjopen-2020-045074supp001.pdf]

**SUPPLEMENTARY TABLES AND FIGURES****Supplementary Table 1: Design of the Target Trial and the Observational Corollary**

| Protocol component              | Target Trial                                                                                         | Observational Corollary*                                                                |
|---------------------------------|------------------------------------------------------------------------------------------------------|-----------------------------------------------------------------------------------------|
| Study question                  | Are sleep medications effective over one year?                                                       | Same                                                                                    |
| Eligible criteria               | Adult men and women reporting a sleep disturbance                                                    | Women in the SWAN cohort reporting a sleep disturbance                                  |
| Other selection criteria        | No use of sleep medications at baseline (or a sufficient washout period); no obstructive sleep apnea | No use of sleep medications at entry into SWAN; one-year follow-up data                 |
| Treatment strategies            | Specific medication for sleep at a known effective dosage versus placebo                             | All known sleep medications at a variety of dosages versus no use of a sleep medication |
| Treatment assignment procedures | Randomization                                                                                        | Based on clinical evaluation during routine medical visits                              |
| Outcome                         | Sleep disturbance, self-reported and measured; assessed monthly                                      | Self-reported sleep disturbances assessed one- and two-years after baseline             |
| Balancing method                | Randomization                                                                                        | Propensity score matching                                                               |
| Causal contrasts of interest    | Intention to treat                                                                                   | Same                                                                                    |

\*Current study. SWAN, Study of Women Across the Nation.

Based on Hernan and Robins, *Am J Epidemiology*, 2016;183:758.

## Supplementary Figure 1: Study Design

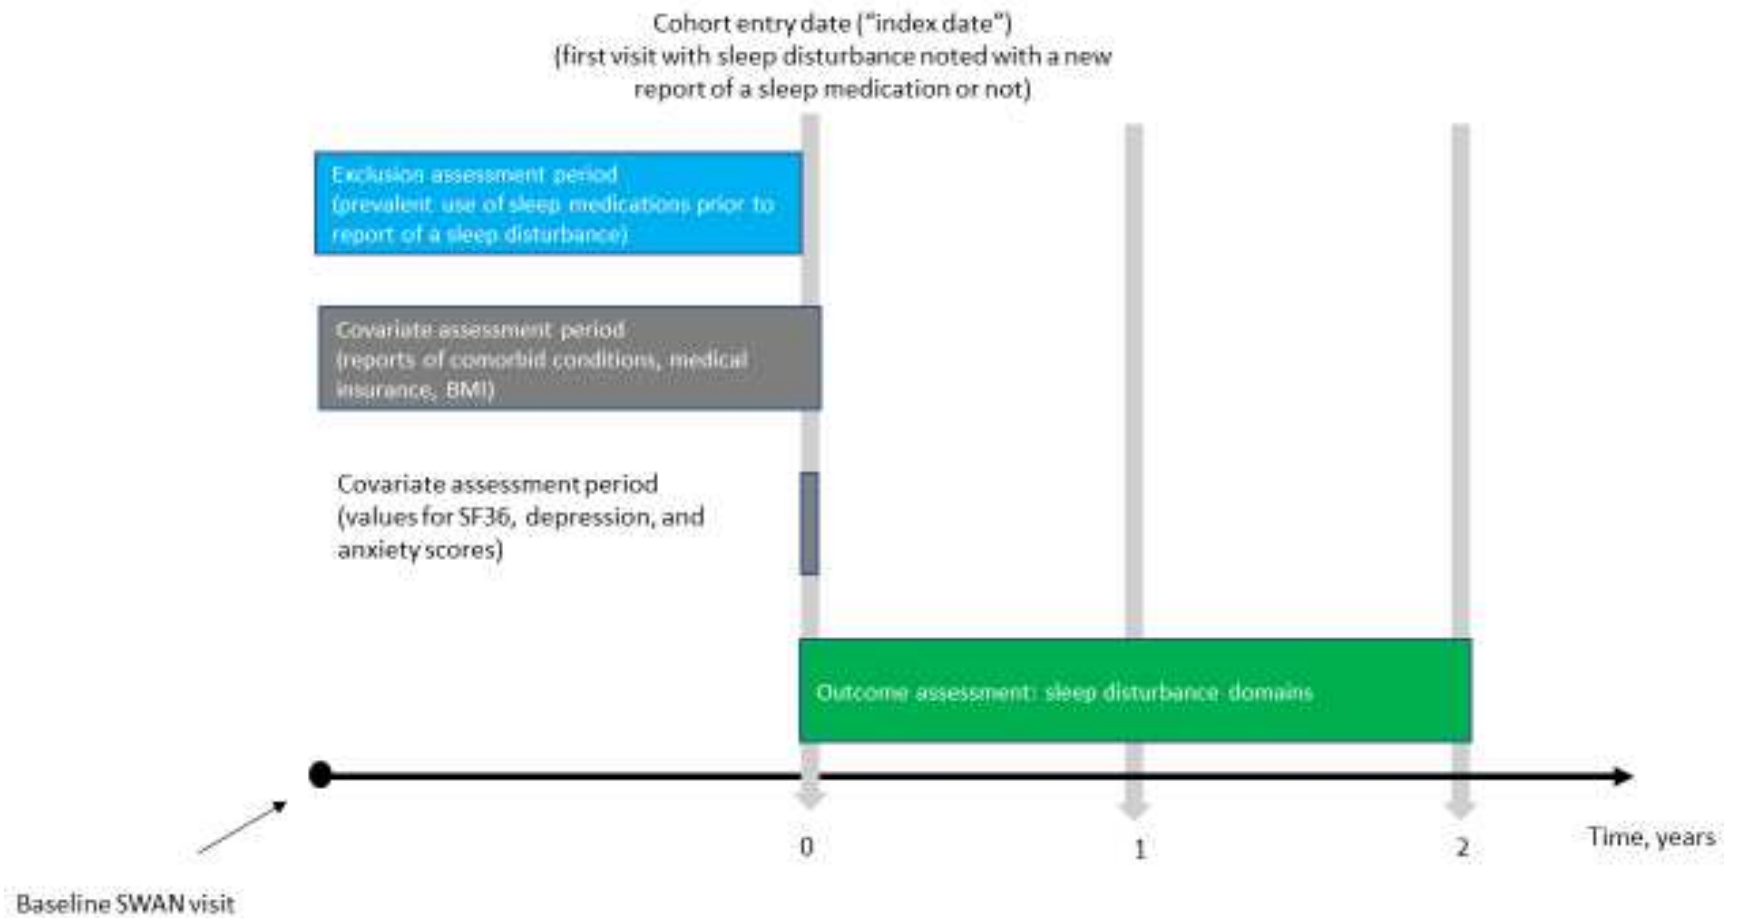

**Supplementary Table 2: Baseline Demographics of Women in SWAN Examined in the Primary Cohort**

|                               | <b>Total<br/>N=1528</b>   | <b>No Sleep<br/>Medication<br/>n=1268</b> | <b>Sleep Medication<br/>User<br/>n=260</b> | <b>SMD</b> |
|-------------------------------|---------------------------|-------------------------------------------|--------------------------------------------|------------|
|                               | <i>N (%) unless noted</i> |                                           |                                            |            |
| Age, mean (SD)                | 49.8 (8.4)                | 49.9 (8.5)                                | 49.3 (7.6)                                 | 0.08       |
| BMI, mean (SD)                | 28.8 (7.2)                | 28.7 (7.1)                                | 29.2 (7.7)                                 | 0.07       |
| Educational attainment        |                           |                                           |                                            |            |
| High school or less           | 319 (20.9)                | 261 (20.6)                                | 58 (22.3)                                  | 0.01       |
| > high school                 | 1201 (78.6)               | 999 (78.8)                                | 202 (77.7)                                 |            |
| Ethnicity/race                |                           |                                           |                                            |            |
| African American              | 406 (26.6)                | 345 (27.2)                                | 61 (23.5)                                  | 0.09       |
| White                         | 782 (51.2)                | 634 (50.0)                                | 148 (56.9)                                 | 0.14       |
| Chinese                       | 135 (8.8)                 | 119 (9.4)                                 | 16 (6.2)                                   | 0.12       |
| Hispanic                      | 44 (2.9)                  | 33 (2.6)                                  | 11 (4.2)                                   | 0.09       |
| Japanese                      | 161 (10.5)                | 137 (10.8)                                | 24 (9.2)                                   | 0.05       |
| Medical insurance             | 1438 (94.1)               | 1186 (93.5)                               | 252 (96.9)                                 | 0.16       |
| Marital status                |                           |                                           |                                            |            |
| Single                        | 194 (12.7)                | 155 (12.2)                                | 39 (15.0)                                  | 0.06       |
| Married                       | 991 (64.9)                | 831 (65.6)                                | 160 (61.5)                                 | 0.15       |
| Separated                     | 43 (2.8)                  | 33 (2.6)                                  | 10 (3.9)                                   | 0.15       |
| Widowed                       | 67 (4.4)                  | 54 (4.3)                                  | 13 (5.0)                                   | 0.08       |
| Divorced                      | 232 (15.2)                | 194 (15.3)                                | 38 (14.6)                                  | 0.03       |
| Tobacco use                   |                           |                                           |                                            |            |
| Never                         | 895 (58.6)                | 761 (60.0)                                | 113 (43.5)                                 | 0.17       |
| Past/Current                  | 629 (41.2)                | 504 (39.8)                                | 125 (48.1)                                 |            |
| Alcohol use                   |                           |                                           |                                            | 0.05       |
| None                          | 733 (49.6)                | 621 (50.7)                                | 112 (44.3)                                 | 0.13       |
| <1 drink/week                 | 373 (25.3)                | 321 (26.2)                                | 52 (20.6)                                  | 0.13       |
| 1-7 drinks/week               | 252 (17.1)                | 190 (15.5)                                | 62 (24.5)                                  | 0.23       |
| >7 drinks/week                | 119 (8.1)                 | 92 (7.5)                                  | 27 (10.7)                                  | 0.11       |
| Depression (CES-D), mean (SD) | 9.4 (9.4)                 | 8.5 (8.6)                                 | 14.1 (11.4)                                | 0.57       |
| Anxiety score, mean (SD)      | 2.4 (2.4)                 | 2.1 (2.2)                                 | 3.4 (2.8)                                  | 0.49       |
| Body pain, mean (SD)          | 68.1 (22.4)               | 69.7 (21.7)                               | 60.1 (24.0)                                | 0.42       |
| SF36-Mental, mean (SD)        | 49.1 (10.4)               | 49.9 (9.9)                                | 45.0 (11.5)                                | 0.45       |
| SF36-Physical, mean (SD)      | 49.7 (9.9)                | 50.2 (9.5)                                | 47.4 (11.5)                                | 0.27       |
| Menopausal Status             |                           |                                           |                                            |            |
| Unknown                       | 138 (9.0)                 | 98 (7.7)                                  | 40 (15.4)                                  | 0.24       |
| Pre-menopausal                | 113 (7.4)                 | 102 (8.0)                                 | 11 (4.2)                                   | 0.16       |
| Early/Late Peri-menopausal    | 597 (39.1)                | 508 (40.1)                                | 89 (34.2)                                  | 0.12       |
| Surgical menopause            | 54 (3.5)                  | 42 (3.3)                                  | 12 (4.6)                                   | 0.07       |
| Post-menopausal               | 625 (40.9)                | 517 (40.8)                                | 108 (41.5)                                 | 0.02       |

|                    |            |            |            |      |
|--------------------|------------|------------|------------|------|
| Diabetes           | 152 (10.0) | 123 (9.7)  | 29 (11.2)  | 0.05 |
| Hypertension       | 616 (40.3) | 488 (38.5) | 128 (49.2) | 0.22 |
| Osteoarthritis     | 565 (37.0) | 448 (35.3) | 117 (45.0) | 0.19 |
| Cancer, current    | 26 (3.5)   | 12 (1.0)   | 14 (5.4)   | 0.16 |
| Any antidepressant | 28 (1.8)   | 11 (0.9)   | 17 (6.5)   | 0.30 |
| Any analgesic      | 72 (4.7)   | 65 (5.1)   | 7 (2.7)    | 0.13 |

**Supplementary Table 3: Baseline Demographics of Women in SWAN Who Were Included in the Current Analyses and Women Who Were Not**

|                               | Women Included in Study Cohort<br>N=685 | Women not Included in Study Cohort<br>n=1846 | SMD   |
|-------------------------------|-----------------------------------------|----------------------------------------------|-------|
| <i>N (%) unless noted</i>     |                                         |                                              |       |
| Age, mean (SD)                | 46.5 (2.7)                              | 46.3 (2.7)                                   | 0.02  |
| BMI, mean (SD)                | 28.2 (7.4)                              | 28.5 (7.4)                                   | 0.03  |
| Educational attainment        |                                         |                                              | 0.001 |
| High school or less           | 141 (20.6)                              | 443 (24.2)                                   |       |
| > high school                 | 542 (79.4)                              | 1387 (75.8)                                  |       |
| Ethnicity/race                |                                         |                                              | 0.001 |
| African American              | 158 (23.1)                              | 564 (30.6)                                   |       |
| White                         | 394 (57.5)                              | 867 (47.0)                                   |       |
| Chinese                       | 45 (6.6)                                | 145 (7.9)                                    |       |
| Hispanic                      | 25 (3.7)                                | 127 (6.9)                                    |       |
| Japanese                      | 63 (9.2)                                | 143 (7.8)                                    |       |
| Medical insurance             | 657 (95.9)                              | 1696 (92.0)                                  | 0.06  |
| Tobacco use                   |                                         |                                              | 0.16  |
| Never                         | 347 (50.7)                              | 1088 (59.0)                                  |       |
| Past/Current                  | 337 (49.3)                              | 756 (41.0)                                   |       |
| Alcohol use                   |                                         |                                              | 0.16  |
| None                          | 294 (44.8)                              | 877 (50.2)                                   |       |
| < 1 drink/week                | 60 (9.1)                                | 179 (10.3)                                   |       |
| 1-7 drinks/week               | 175 (26.6)                              | 469 (28.9)                                   |       |
| >7 drinks/week                | 128 (19.5)                              | 221 (12.7)                                   |       |
| Depression (CES-D), mean (SD) | 12.3 (10.2)                             | 10.7 (9.6)                                   | 0.31  |
| Anxiety score, mean (SD)      | 3.1 (2.7)                               | 2.5 (2.3)                                    | 0.30  |
| Body pain, mean (SD)          | 65.3 (21.5)                             | 68.8 (22.6)                                  | 0.27  |
| Menopausal Status             |                                         |                                              | 0.05  |
| Unknown                       | 2 (0.3)                                 | 3 (0.2)                                      |       |
| Pre-menopausal                | 315 (46.3)                              | 1023 (55.8)                                  |       |
| Early Peri-menopausal         | 364 (53.5)                              | 808 (44.1)                                   |       |
| Diabetes                      | 33 (4.8)                                | 90 (4.9)                                     | 0.01  |
| Hypertension                  | 160 (23.5)                              | 423 (23.1)                                   | 0.07  |
| Osteoarthritis                | 150 (22.1)                              | 312 (17.1)                                   | 0.02  |

Abbreviations: SMD, standardized mean difference; CES-D, Center for Epidemiologic Studies Depression Scale; BMI, Body Mass Index; SF36 Mental, Mental Component Score; and SF36 Physical, Physical Component Score.

**Supplementary Table 4: Change in severity of sleep disturbances from baseline to year 1 for those propensity score matched at baseline minus 1 year**

|                                              | Index Visit<br>No Meds<br>n=477 |       | Index Visit<br>Med Users<br>n=253 |       | Visit 1 year<br>after<br>No Meds<br>n=477 |       | Visit 1 year<br>after<br>Med Users<br>n=253 |       | Visit 2 year<br>after<br>No Meds<br>n=361 |       | Visit 2 year<br>after<br>Med Users<br>n=197 |       | P-value           |
|----------------------------------------------|---------------------------------|-------|-----------------------------------|-------|-------------------------------------------|-------|---------------------------------------------|-------|-------------------------------------------|-------|---------------------------------------------|-------|-------------------|
|                                              | n                               | %     | n                                 | %     | n                                         | %     | n                                           | %     | n                                         | %     | n                                           | %     |                   |
| <b>Difficulty initiating sleep</b>           |                                 |       |                                   |       |                                           |       |                                             |       |                                           |       |                                             |       | 0.17 <sup>1</sup> |
|                                              |                                 |       |                                   |       |                                           |       |                                             |       |                                           |       |                                             |       | 0.11 <sup>2</sup> |
|                                              |                                 |       |                                   |       |                                           |       |                                             |       |                                           |       |                                             |       | 0.83 <sup>3</sup> |
| 1                                            | 188                             | 39.4% | 81                                | 32.0% | 199                                       | 41.7% | 96                                          | 37.9% | 150                                       | 41.6% | 71                                          | 36.0% |                   |
| 2                                            | 87                              | 18.2% | 31                                | 12.3% | 90                                        | 18.9% | 31                                          | 12.3% | 74                                        | 20.5% | 34                                          | 17.3% |                   |
| 3                                            | 98                              | 20.5% | 44                                | 17.4% | 90                                        | 18.9% | 41                                          | 16.2% | 72                                        | 19.9% | 35                                          | 17.8% |                   |
| 4                                            | 57                              | 11.9% | 42                                | 16.6% | 47                                        | 9.9%  | 38                                          | 15.0% | 28                                        | 7.8%  | 18                                          | 9.1%  |                   |
| 5                                            | 47                              | 9.9%  | 55                                | 21.7% | 51                                        | 10.7% | 47                                          | 18.6% | 37                                        | 10.2% | 39                                          | 19.8% |                   |
| <b>Waking frequently during sleep</b>        |                                 |       |                                   |       |                                           |       |                                             |       |                                           |       |                                             |       | 0.55 <sup>1</sup> |
|                                              |                                 |       |                                   |       |                                           |       |                                             |       |                                           |       |                                             |       | 0.14 <sup>2</sup> |
|                                              |                                 |       |                                   |       |                                           |       |                                             |       |                                           |       |                                             |       | 0.31 <sup>3</sup> |
| 1                                            | 58                              | 12.2% | 20                                | 7.9%  | 78                                        | 16.4% | 35                                          | 13.8% | 60                                        | 16.6% | 25                                          | 12.7% |                   |
| 2                                            | 66                              | 13.8% | 23                                | 9.1%  | 67                                        | 14.0% | 27                                          | 10.7% | 49                                        | 13.6% | 25                                          | 12.7% |                   |
| 3                                            | 102                             | 21.4% | 37                                | 14.6% | 96                                        | 20.1% | 38                                          | 15.0% | 75                                        | 20.8% | 38                                          | 19.3% |                   |
| 4                                            | 97                              | 20.3% | 73                                | 28.9% | 95                                        | 19.9% | 52                                          | 20.6% | 65                                        | 18.0% | 41                                          | 20.8% |                   |
| 5                                            | 154                             | 32.3% | 100                               | 39.5% | 141                                       | 29.6% | 101                                         | 39.9% | 112                                       | 31.0% | 68                                          | 34.5% |                   |
| <b>Early morning awakening</b>               |                                 |       |                                   |       |                                           |       |                                             |       |                                           |       |                                             |       | 0.82 <sup>1</sup> |
|                                              |                                 |       |                                   |       |                                           |       |                                             |       |                                           |       |                                             |       | 0.02 <sup>2</sup> |
|                                              |                                 |       |                                   |       |                                           |       |                                             |       |                                           |       |                                             |       | 0.02 <sup>3</sup> |
| 1                                            | 161                             | 33.8% | 69                                | 27.3% | 192                                       | 40.3% | 77                                          | 30.4% | 135                                       | 37.4% | 73                                          | 37.1% |                   |
| 2                                            | 105                             | 22.0% | 37                                | 14.6% | 94                                        | 19.7% | 50                                          | 19.8% | 75                                        | 20.8% | 32                                          | 16.2% |                   |
| 3                                            | 100                             | 21.0% | 53                                | 20.9% | 77                                        | 16.1% | 37                                          | 14.6% | 69                                        | 19.1% | 37                                          | 18.8% |                   |
| 4                                            | 66                              | 13.8% | 45                                | 17.8% | 62                                        | 13.0% | 34                                          | 13.4% | 39                                        | 10.8% | 21                                          | 10.7% |                   |
| 5                                            | 45                              | 9.4%  | 49                                | 19.4% | 52                                        | 10.9% | 55                                          | 21.7% | 43                                        | 11.9% | 34                                          | 17.3% |                   |
| <b>Any Complaint of 3 or more times week</b> |                                 |       |                                   |       |                                           |       |                                             |       |                                           |       |                                             |       | 0.10 <sup>1</sup> |
|                                              |                                 |       |                                   |       |                                           |       |                                             |       |                                           |       |                                             |       | 0.04 <sup>2</sup> |
|                                              |                                 |       |                                   |       |                                           |       |                                             |       |                                           |       |                                             |       | 0.53 <sup>3</sup> |
| Yes                                          | 279                             | 58.5% | 198                               | 78.3% | 264                                       | 55.3% | 172                                         | 68.0% | 197                                       | 54.6% | 128                                         | 65.0% |                   |

5-point Likert scale where 1 = no difficulties on any nights, 2 = difficulties on less <1 night/week, 3 = 1-2 nights per week, 4 = 3-4 nights per week, and 5 = 5-7 nights per week.

\*p-values reflect change in severity of disturbances: <sup>1</sup>=baseline vs visit 1, <sup>2</sup>= baseline vs visit 2, <sup>3</sup>= visit 1 vs. visit 2.

**Supplementary Figure 2. Sleep Disturbance Ratings by Medication Exposure During Follow-up  
In women who reported a 4 or 5 on any severity scale**

**Legend:** Means calculated based on 5-point Likert scale where 1 = no difficulties on any nights, 2 = difficulties on <1 night/week, 3 = 1-2 nights per week, 4 = 3-4 nights per week, and 5 = 5-7 nights per week. Error bars represent standard errors. P-values estimated from the Wilcoxon Rank Sum test.

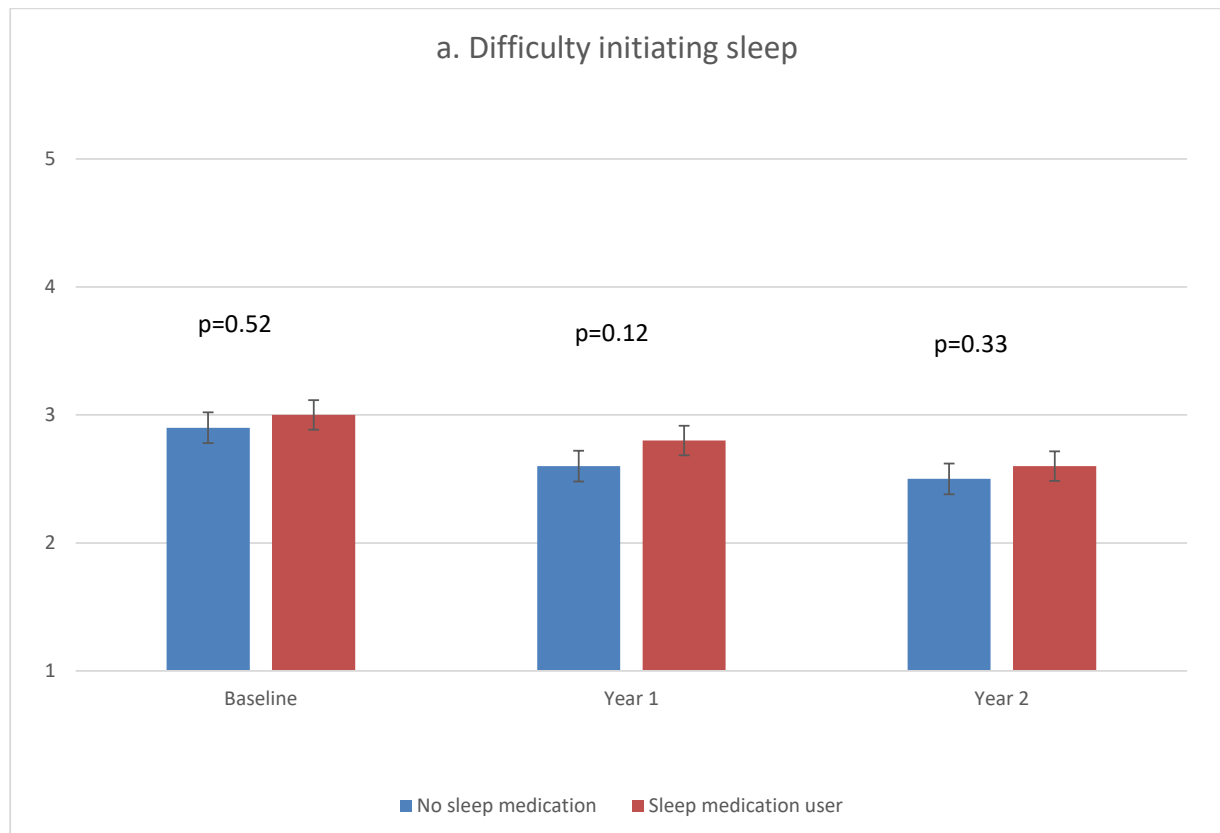

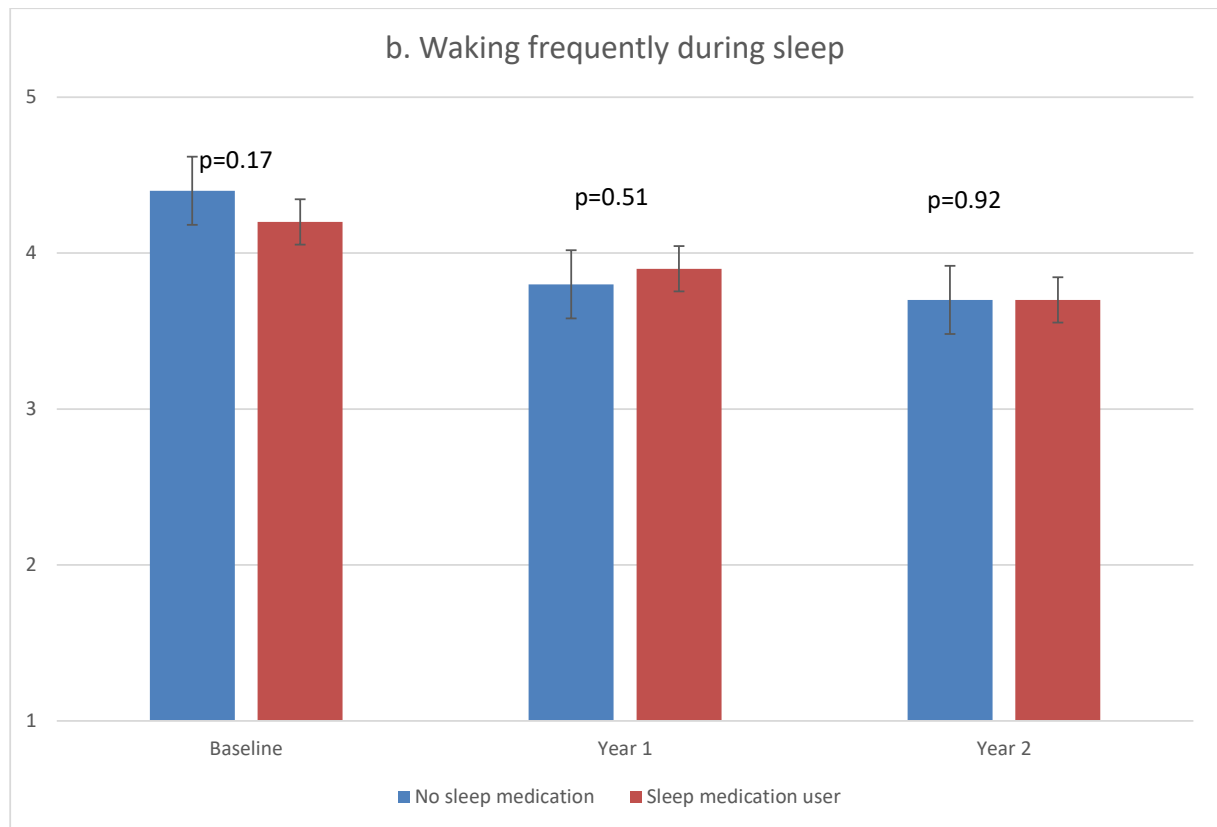



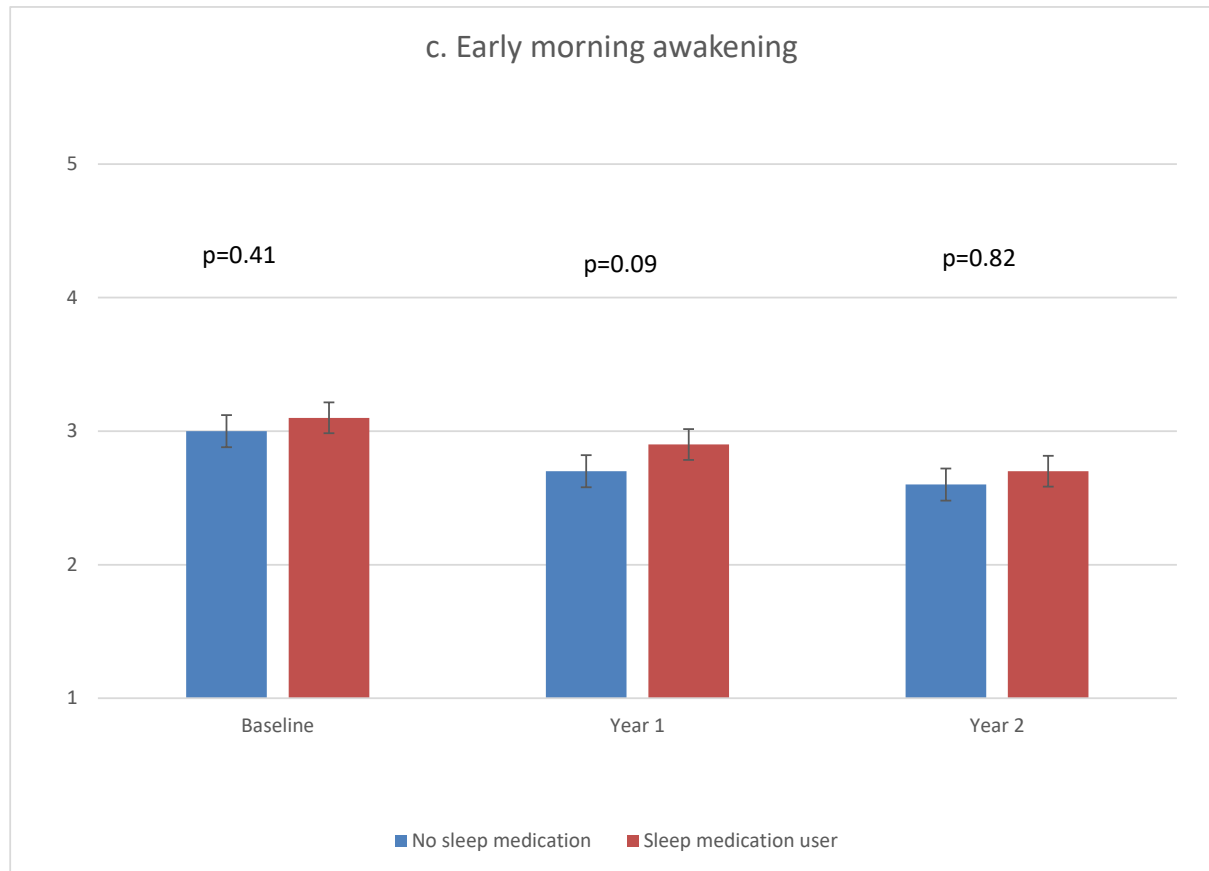

**Supplementary Table 5: Change in severity of sleep disturbances from baseline to year 1 using a proportional odds analysis**

|                             | Year 0 versus Year 1                                                | Year 1 versus Year 2 | Year 0 versus Year 2 |
|-----------------------------|---------------------------------------------------------------------|----------------------|----------------------|
|                             | Odds ratio (95% CI) comparing sleep medication users with non-users |                      |                      |
| Difficulty initiating sleep | 0.89 (0.58 – 1.30)                                                  | 0.72 (0.42 – 1.30)   | 0.80 (0.61 – 1.00)   |
| Waking frequently           | 0.92 (0.58 – 1.40)                                                  | 1.44 (0.82 – 2.50)   | 1.20 (0.90 – 1.50)   |
| Early morning awakening     | 0.75 (0.49 – 1.20)                                                  | 1.20 (0.67 – 2.00)   | 0.94 (0.72 – 1.20)   |

Notes: The odds ratios represent the odds of a one level increase in the Likert scale, comparing sleep medication users to non-users.

**Supplementary Table 6: Original models additionally adjusted for site and estrogen use**

|                             | Year 0 vs Year 1 |         | Year 0 vs Year 2 |         | Year 1 vs Year 2 |         |
|-----------------------------|------------------|---------|------------------|---------|------------------|---------|
|                             | Estimate         | P-value | Estimate         | P-value | Estimate         | P-value |
| Difficulty initiating sleep | -0.15            | 0.3     | -0.18            | 0.04    | -0.24            | 0.21    |
| Waking Frequently           | -0.03            | 0.83    | 0.11             | 0.22    | 0.21             | 0.02    |
| Early morning awakening     | -0.19            | 0.22    | -0.12            | 0.17    | -0.07            | 0.45    |

The significant p-value in Year 0 vs Year 2 shows that the non users decreased by .12 and the med users increased by .06. The significant p-value in Year 1 vs Year 2 shows that non users decreased by .004 and the med users decreased by .22.
